# Supplementary material
Source: Springer Nature journal article supplement (https://www.springermedizin.de/resource/supplementary/12874_2008_355_MOESM2_ESM.pdf/9434298)
Supplement: MOESM2 [file 9434298]

| Source   | DF      | SS                                                                                | E(MS)                                                                                                                                                                              |
|----------|---------|-----------------------------------------------------------------------------------|------------------------------------------------------------------------------------------------------------------------------------------------------------------------------------|
| Group    | $2 - 1$ | $\sum_{i=1}^2 \sum_{j=1}^Q \sum_{k=1}^{m_{ij}} (\bar{Y}_{i..} - \bar{Y}_{...})^2$ | $\sigma_\varepsilon^2 + \sigma_B^2 \left( \sum_{i=1}^2 \frac{1}{n_i} \sum_{j=1}^Q m_{ij}^2 - \frac{1}{N} \sum_{i=1}^2 \sum_{j=1}^Q m_{ij}^2 \right) + \sum_{i=1}^2 n_i \alpha_i^2$ |
| Residual | $N - 2$ | $\sum_{i=1}^2 \sum_{j=1}^Q \sum_{k=1}^{m_{ij}} (Y_{ijk} - \bar{Y}_{i..})^2$       | $\sigma_\varepsilon^2 + \sigma_B^2 \frac{1}{N - 2} \left( N - \sum_{i=1}^2 \frac{1}{n_i} \sum_{j=1}^Q m_{ij}^2 \right)$                                                            |
| Total    | $N - 1$ | $\sum_{i=1}^2 \sum_{j=1}^Q \sum_{k=1}^{m_{ij}} (Y_{ijk} - \bar{Y}_{...})^2$       |                                                                                                                                                                                    |
